# Supplementary material
Source: PubMed Central journal article supplement (PMC5586563)
Supplement: CJN.00530117SupplementaryData.pdf [file CJN.00530117SupplementaryData.pdf]

*Supplemental material is neither peer-reviewed nor thoroughly edited by CJASN. The authors alone are responsible for the accuracy and presentation of the material.*

**Supplementary Material for:**

**Effects of Vitamin D<sub>2</sub> Supplementation on Vitamin D<sub>3</sub> Metabolism in Health and Chronic Kidney Disease**

Zona Batacchi, Cassianne Robinson-Cohen, Andrew N. Hoofnagle, Tamara Isakova, Bryan Kestenbaum, Kevin J Martin,

Myles Wolf, Ian H. de Boer

## Supplementary Methods

### Exclusion criteria

Exclusion criteria included rapidly advancing renal failure, treatment with a vitamin D receptor agonist or phenytoin, current hospitalization or within the previous 6 weeks, pregnancy, breastfeeding, anemia (hematocrit <27%), serum calcium >10.2 mg/dL, history of parathyroid disease, 1+ or greater dipstick proteinuria (for healthy subjects only), history of gastrointestinal diseases that could impede absorptive ability, liver disease (ALT or AST > 100U/L) or cholestasis (direct bilirubin >1.0 mg/dL, because of the limitation of fat soluble vitamin absorption in this setting), and renal replacement therapy.

### Estimation of circulating bioavailable 25-hydroxyvitamin D concentrations

Circulating bioavailable 25-hydroxyvitamin D concentrations were estimated from plasma concentrations of total 25-hydroxyvitamin D, vitamin D binding protein, and albumin and vitamin D binding protein isoform using published methods, described here.

#### Abbreviations and Definitions:

25(OH)D = 25-hydroxyvitamin D

[D<sub>total</sub>] = plasma 25(OH)D concentration = [25(OH)D<sub>2</sub> + 25(OH)D<sub>3</sub>]

[D<sub>free</sub>] = free plasma 25(OH)D concentration

[D<sub>bio</sub>] = bioavailable D concentration = [D<sub>free</sub>] + [D<sub>Alb</sub>]

[Alb] = Albumin

[D<sub>Alb</sub>] = concentration of albumin-bound 25(OH)D

[VDBP] = vitamin D binding protein concentration

[D<sub>DBP</sub>] = concentration of D binding protein –bound to 25(OH)D

[D<sub>freeDBP</sub>] = concentration of unbound DBP = total VDBP - [D<sub>DBP</sub>]

K<sub>alb</sub> = affinity constant between 25(OH)D and albumin =  $6 \times 10^5 \text{ M}^{-1}$

K<sub>DBP</sub> = affinity constant between 25(OH)D and DBP with haplotype specific affinity constants as follows:

if haplotype was homozygous Gc1F, K<sub>DBP</sub> =  $6.8 \times 10^8 \text{ M}^{-1}$

if haplotype was homozygous Gc1F, K<sub>DBP</sub> =  $11.2 \times 10^8 \text{ M}^{-1}$

if haplotype was homozygous Gc2, K<sub>DBP</sub> =  $3.6 \times 10^8 \text{ M}^{-1}$

if haplotype was heterozygous Gc2/Gc1F, K<sub>DBP</sub> =  $7.4 \times 10^8 \text{ M}^{-1}$

if haplotype was heterozygous Gc2/Gc1S,  $K_{DBP} = 4.8 \times 10^8 \text{ M}^{-1}$

The affinity constants were determined in a prior study by Arnaud and Constans <sup>1</sup>. The binding coefficients for heterozygous haplotypes were the mean of the 2 binding coefficients of the specific DBP carriers <sup>2</sup>.

Known equations adapted from Powe, et al <sup>3</sup>.

1.  $[D_{Alb}] = K_{alb} \times [Alb] \times [D_{free}]$
2.  $[D_{DBP}] = [D_{total}] - [D_{Alb}] - [D_{free}]$
3.  $[D_{free}] = [D_{DBP}] \div K_{DBP} \div [D_{free}DBP]$
4.  $[D_{free}DBP] = \text{total VDBP} - [D_{DBP}]$

Therefore, using equations 3 and 4:

$$[D_{free}] = [D_{DBP}] \div K_{DBP} \div ([VDBP] - [D_{DBP}])$$

and using equations 1 and 2:

$$[D_{DBP}] = [D_{total}] - (K_{alb} \times [Alb] + 1) \times [D_{free}]$$

and

$$[D_{free}] = ([D_{total}] - (K_{alb} \times [Alb] + 1) \times [D_{free}]) \div K_{DBP} ([VDBP] - ([D_{total}] - (K_{alb} \times [Alb] + 1) \times [D_{free}]))$$

Further simplified into a polynomial equation (second-degree):  $ax^2 + bx + c$

Where

$$x = [D_{free}]$$

$$a = K_{DBP} \times K_{alb} \times [Alb] + K_{DBP}$$

$$b = K_{DBP} \times [VDBP] - K_{DBP}[D_{total}] + K_{alb} \times [Alb] + 1$$

$$c = -[D_{total}]$$

$$\text{Therefore: } [D_{free}] = \frac{-b \pm \sqrt{b^2 - 4ac}}{2a}$$

Bioavailable D can then be calculated:

$$[D_{bio}] = [D_{free}] + [D_{Alb}] = (K_{alb} \times [Alb] + 1) \times [D_{free}]$$

References for calculations:

1. Arnaud J, Constans J. Affinity differences for vitamin D metabolites associated with the genetic isoforms of the human serum carrier protein (DBP). *Human genetics*. Sep 1993;92(2):183-188.
2. Johnsen MS, Grimnes G, Figenschau Y, Torjesen PA, Almas B, Jorde R. Serum free and bio-available 25-hydroxyvitamin D correlate better with bone density than serum total 25-hydroxyvitamin D. *Scand J Clin Lab Invest*. Apr 2014;74(3):177-183.
3. Powe CE, Ricciardi C, Berg AH, et al. Vitamin D-binding protein modifies the vitamin D-bone mineral density relationship. *Journal of bone and mineral research : the official journal of the American Society for Bone and Mineral Research*. Jul 2011;26(7):1609-1616.

**Supplementary Table S1: Baseline characteristics of participants by screening eGFR (based on local creatinine measurement and the MDRD formula) and baseline eGFR (based on central creatinine and cystatin C measurement and the CKD-EPI formula), identifying 16 participants with discordant eGFR classification.**

| Characteristic                                      | Estimated GFR                                                    |                                                |                                                                  |
|-----------------------------------------------------|------------------------------------------------------------------|------------------------------------------------|------------------------------------------------------------------|
|                                                     | Screening and baseline eGFR <60 mL/min/1.73m <sup>2</sup> (N=24) | Discordant screening and baseline eGFR (N=16*) | Screening and baseline eGFR ≥60 mL/min/1.73m <sup>2</sup> (N=29) |
| Age                                                 | 61.8±12.9                                                        | 53.6±15.6                                      | 51.8±13.6                                                        |
| Sex                                                 |                                                                  |                                                |                                                                  |
| Male                                                | 18 (75)                                                          | 8 (50)                                         | 15 (51.7)                                                        |
| Female                                              | 6 (25)                                                           | 8 (50)                                         | 14 (48.3)                                                        |
| Race/ethnicity                                      |                                                                  |                                                |                                                                  |
| White                                               | 13 (54.2)                                                        | 12 (75.0)                                      | 14 (48.3)                                                        |
| Black                                               | 8 (33.3)                                                         | 4 (25.0)                                       | 6 (20.7)                                                         |
| Hispanic                                            | 3 (12.5)                                                         | 0 (0.0)                                        | 7 (24.1)                                                         |
| Asian                                               | 0 (0.0)                                                          | 0 (0.0)                                        | 2 (6.9)                                                          |
| Baseline creatinine (mg/dL)                         | 2.0±0.9                                                          | 1.1±0.3                                        | 0.8±0.2                                                          |
| Baseline estimated GFR (mL/min/1.73m <sup>2</sup> ) | 39.3±12.6                                                        | 82.0±18.9                                      | 135.6±44.6                                                       |
| Baseline estimated GFR category                     |                                                                  |                                                |                                                                  |
| ≥60 mL/min/1.73m <sup>2</sup>                       | 0 (0.0)                                                          | 15 (93.8)                                      | 29 (100.0)                                                       |
| 45-59 mL/min/1.73m <sup>2</sup>                     | 8 (33.3)                                                         | 1 (6.3)                                        | 0 (0.0)                                                          |
| 30-44 mL/min/1.73m <sup>2</sup>                     | 11 (45.8)                                                        | 0 (0.0)                                        | 0 (0.0)                                                          |
| 15-29 mL/min/1.73m <sup>2</sup>                     | 4 (16.7)                                                         | 0 (0.0)                                        | 0 (0.0)                                                          |
| <15 mL/min/1.73m <sup>2</sup>                       | 1 (4.2)                                                          | 0 (0.0)                                        | 0 (0.0)                                                          |
| Screening creatinine                                | 2.1±0.8                                                          | 1.5±0.3                                        | 1.0±0.2                                                          |
| Screening eGFR                                      | 36.5±10.3                                                        | 48.9±8.7                                       | 77.4±12.3                                                        |
| Screening eGFR category                             |                                                                  |                                                |                                                                  |
| ≥60 mL/min/1.73m <sup>2</sup>                       | 0 (0.0)                                                          | 1(6.3)                                         | 29 (100)                                                         |

Supplemental material is neither peer-reviewed nor thoroughly edited by CJASN. The authors alone are responsible for the accuracy and presentation of the material.

|                                 |           |           |         |
|---------------------------------|-----------|-----------|---------|
| 45-59 mL/min/1.73m <sup>2</sup> | 6 (25.0)  | 11 (68.8) | 0 (0.0) |
| 30-44 mL/min/1.73m <sup>2</sup> | 14 (58.3) | 4 (25.0)  | 0 (0.0) |
| 15-29 mL/min/1.73m <sup>2</sup> | 3 (12.5)  | 0 (0.0)   | 0 (0.0) |
| <15 mL/min/1.73m <sup>2</sup>   | 1 (4.2)   | 0 (0.0)   | 0 (0.0) |

Cell contents are presented as N (%) or mean ( $\pm$  standard deviations). Screening eGFR was based on local creatinine measurements and calculated using the MDRD formula, and baseline eGFR was based on central creatinine and cystatin C measurement and calculated using the CKD-EPI formula. (\*) The discordant group includes 15 participants with screening GFR <60 and baseline eGFR  $\geq$ 60 mL/min/1.73m<sup>2</sup> and 1 participant with screening GFR  $\geq$ 60 and baseline eGFR <60 mL/min/1.73m<sup>2</sup>.

**Supplementary Table S2: Mineral Metabolism Biomarkers by CKD status, before and after treatment, excluding 16 participants with discordant screening and baseline eGFR values.**

| Biomarker                                                           | CKD (eGFR <60 mL/min/1.73m <sup>2</sup> ) |                |                     |         | Non-CKD (eGFR ≥60 mL/min/1.73m <sup>2</sup> ) |                |                     |         | Difference in Change by CKD status |                     |
|---------------------------------------------------------------------|-------------------------------------------|----------------|---------------------|---------|-----------------------------------------------|----------------|---------------------|---------|------------------------------------|---------------------|
|                                                                     | Baseline                                  | Post-treatment | Change (95% CI)     | p-value | Baseline                                      | Post-treatment | Change (95% CI)     | p-value | Difference in change (95% CI)      | p-value interaction |
| 25(OH)D total (ng/mL)                                               | 19.7 (1.1)                                | 40.7 (1.9)     | 21.0 (16.8, 25.3)   | <0.001  | 18.8 (1.7)                                    | 37.6 (1.7)     | 18.8 (14.8,22.8)    | <0.001  | 3.9 (-2.6,10.4)                    | 0.24                |
| 25(OH)D <sub>3</sub> (ng/mL)                                        | 17.6 (1.1)                                | 10.0 (1.1)     | -7.6 (-9.3,-5.9)    | <0.001  | 16.2 (1.0)                                    | 8.0 (1.0)      | -8.2 (-9.7,-6.6)    | <0.001  | 0.5 (-1.9,2.8)                     | 0.70                |
| 25(OH)D <sub>2</sub> (ng/mL)                                        | 2.1 (1.7)                                 | 30.9 (1.8)     | 28.8 (24.5,33.1)    | <0.001  | 2.6 (1.6)                                     | 29.5 (1.6)     | 26.9 (23.0,30.9)    | <0.001  | 3.7 (-2.6,10.0)                    | 0.25                |
| 1,25(OH) <sub>2</sub> D total (pg/mL)                               | 30.9 (2.7)                                | 34.4 (2.8)     | 3.5 (-1.9,8.9)      | 0.21    | 49.9 (2.5)                                    | 49.6 (2.6)     | -0.2 (-5.3,4.8)     | 0.92    | 2.8 (-4.6,10.1)                    | 0.46                |
| 1,25(OH) <sub>2</sub> D <sub>3</sub> (pg/mL)                        | 28.7 (2.4)                                | 10.43 (2.5)    | -18.4 (-23.9,-12.8) | <0.001  | 47.3 (2.2)                                    | 15.4 (2.3)     | -31.9 (-37.0,-26.8) | <0.001  | 13.0 (5.2,20.8)                    | 0.001               |
| 1,25(OH) <sub>2</sub> D <sub>2</sub> (pg/mL)                        | 2.2 (1.7)                                 | 24.1 (1.8)     | 21.9 (17.3,26.6)    | <0.001  | 2.6 (1.6)                                     | 34.2 (1.6)     | 31.6 (27.3,35.9)    | <0.001  | -10.2 (-16.5,-3.8)                 | 0.002               |
| 24,25 (OH) <sub>2</sub> D <sub>3</sub> (ng/mL)                      | 1.2 (0.2)                                 | 1.0 (0.2)      | -0.3 (-0.5,-0.0)    | 0.06    | 2.1 (0.2)                                     | 1.5 (0.2)      | -0.5 (-0.8,-0.3)    | <0.001  | 0.2 (-0.1,0.6)                     | 0.21                |
| PTH (pg/mL)                                                         | 116.6 (10.6)                              | 101.1 (10.6)   | -15.6 (-28.0,-3.1)  | 0.01    | 57.6 (9.8)                                    | 49.4 (9.8)     | -8.2 (-19.8,3.3)    | 0.16    | -6.3 (-23.9,11.4)                  | 0.49                |
| FGF-23 (pg/mL)                                                      | 86.9 (6.6)                                | 89.6 (6.6)     | 2.7 (-5.8,11.2)     | 0.54    | 41.2 (6.1)                                    | 44.3 (6.1)     | 3.0 (-4.8,10.9)     | 0.45    | 0.2 (-11.7,12.0)                   | 0.98                |
| Calcium (mg/dL)                                                     | 9.0 (0.2)                                 | 8.9 (0.2)      | -0.1 (-0.4,0.1)     | 0.30    | 9.0 (0.2)                                     | 9.0 (0.2)      | 0.0 (-0.2,0.3)      | 0.83    | -0.2 (-0.6,0.2)                    | 0.35                |
| Phosphorus (mg/dL)                                                  | 3.5 (0.2)                                 | 3.5 (0.2)      | 0.1 (-0.4,0.6)      | 0.78    | 3.4 (0.2)                                     | 3.8 (0.2)      | 0.4 (0.0,0.9)       | 0.06    | -0.4 (-1.1,0.3)                    | 0.23                |
| 24,25(OH) <sub>2</sub> D <sub>3</sub> :25(OH)D <sub>3</sub> (pg/ng) | 67.8 (9.9)                                | 102.8 (10.0)   | 35.0 (14.4,55.7)    | 0.001   | 119.5 (9.1)                                   | 206.1 (9.3)    | 86.6 (67.5,105.6)   | <0.001  | -56.2 (-84.4,-28.1)                | <0.001              |
| 1,25(OH) <sub>2</sub> D <sub>3</sub> :25(OH)D <sub>3</sub> (pg/ng)  | 1.8 (0.2)                                 | 1.1 (0.2)      | -0.6 (-1.2,-0.1)    | 0.02    | 3.4 (0.2)                                     | 1.9 (0.2)      | -1.5 (-2.0,-1.0)    | <0.001  | 0.8 (0.1,1.6)                      | 0.03                |

Supplemental material is neither peer-reviewed nor thoroughly edited by CJASN. The authors alone are responsible for the accuracy and presentation of the material.

|                                   |             |             |                   |        |             |             |                 |        |                    |      |
|-----------------------------------|-------------|-------------|-------------------|--------|-------------|-------------|-----------------|--------|--------------------|------|
| Vitamin D binding protein (µg/mL) | 262.2 (7.5) | 250.9 (7.6) | -11.3 (-23.0,0.4) | 0.06   | 249.2 (6.9) | 254.9 (7.0) | 5.7 (-5.1,16.4) | 0.30   | -19.7 (-35.8,-3.6) | 0.02 |
| Estimated bioavailable 25(OH)D    | 2.4 (0.4)   | 5.1 (0.4)   | 2.7 (1.9,3.4)     | <0.001 | 2.3 (0.3)   | 4.6 (0.3)   | 2.3 (1.6,2.9)   | <0.001 | 0.4 (-0.6,1.4)     | 0.43 |

Cell contents are mean (SD), mean change (95% confidence interval), difference in mean changes (95% confidence interval), or p-value for interaction comparing change among participants with CKD to change among participants without CKD. Abbreviations: 25(OH)D, 25-hydroxyvitamin D; 25(OH)D<sub>3</sub>, 25-hydroxyvitamin D<sub>3</sub>; 25(OH)D<sub>2</sub>, 25-hydroxyvitamin D<sub>2</sub>; 25(OH)D total, 25-hydroxyvitamin D<sub>2</sub> and 25-hydroxyvitamin D<sub>3</sub>; 1,25(OH)<sub>2</sub>D<sub>2</sub>, 1,25-dihydroxyvitamin D<sub>2</sub>; 1,25(OH)<sub>2</sub>D<sub>3</sub>, 1,25-dihydroxyvitamin D<sub>3</sub>; total, 1,25-dihydroxyvitamin D<sub>2</sub> and 1,25-dihydroxyvitamin D<sub>3</sub>; 24,25(OH)<sub>2</sub>D<sub>3</sub>, 24,25-dihydroxyvitamin D<sub>3</sub>; PTH, parathyroid hormone; FGF-23, fibroblast growth factor 23; 24,25(OH)<sub>2</sub>D<sub>3</sub>:25(OH)D, the ratio of 24,25-dihydroxyvitamin D<sub>3</sub> and 25-hydroxyvitamin D<sub>3</sub>; 1,25(OH)<sub>2</sub>D<sub>3</sub>:25(OH)D<sub>3</sub>, the ratio of 1,25-dihydroxyvitamin D<sub>3</sub> and 25-hydroxyvitamin D<sub>3</sub>.

**Supplementary Table S3. Percentage Change in Mineral Metabolism Biomarkers by CKD status, before and after treatment.**

| Biomarker                                                          | Mean change with treatment (% , with SD)  |                                               | Difference in mean change with treatment by CKD status (% , with 95% CI) | p-value interaction |
|--------------------------------------------------------------------|-------------------------------------------|-----------------------------------------------|--------------------------------------------------------------------------|---------------------|
|                                                                    | CKD (eGFR <60 mL/min/1.73m <sup>2</sup> ) | Non-CKD (eGFR ≥60 mL/min/1.73m <sup>2</sup> ) |                                                                          |                     |
| 25(OH)D total (ng/mL)                                              | 135.5<br>(73.7)                           | 131.8<br>(144.9)                              | 3.7<br>(-55.8,63.3)                                                      | 0.90                |
| 25(OH)D <sub>3</sub> (ng/mL)                                       | -41.9<br>(12.8)                           | -49.1<br>(18.6)                               | 7.3<br>(-0.9,15.4)                                                       | 0.08                |
| 25(OH)D <sub>2</sub> (ng/mL)                                       | 7426.6<br>(7672.2)                        | 10653.0<br>(12925.9)                          | -3226.4<br>(-8684.7,2232.0)                                              | 0.25                |
| 1,25(OH) <sub>2</sub> D total (pg/mL)                              | 18.4<br>(31.0)                            | 7.8<br>(68.7)                                 | 10.6<br>(-17.1,38.4)                                                     | 0.45                |
| 1,25(OH) <sub>2</sub> D <sub>3</sub> (pg/mL)                       | -62.1<br>(16.8)                           | -61.5<br>(43.1)                               | -0.6<br>(-17.8,16.5)                                                     | 0.94                |
| 1,25(OH) <sub>2</sub> D <sub>2</sub> (pg/mL)                       | 3526.2<br>(3405.7)                        | 3997.0<br>(5225.6)                            | -470.9<br>(-2729.0,1787.3)                                               | 0.68                |
| 24,25 (OH) <sub>2</sub> D <sub>3</sub> (ng/mL)                     | -10.6<br>(31.7)                           | -12.0<br>(37.2)                               | 1.4<br>(-15.9,18.7)                                                      | 0.87                |
| PTH (pg/mL)                                                        | 2.3<br>(39.5)                             | -13.8<br>(30.1)                               | 16.1<br>(-0.5,32.8)                                                      | 0.06                |
| FGF-23 (pg/mL)                                                     | 3.9<br>(29.0)                             | 10.4<br>(35.5)                                | -6.6<br>(-22.6,9.4)                                                      | 0.42                |
| Calcium (mg/dL)                                                    | 1.9<br>(17.8)                             | 1.7<br>(10.1)                                 | 0.2<br>(-7.1,7.5)                                                        | 0.96                |
| Phosphorus (mg/dL)                                                 | 5.6<br>(23.6)                             | 10.8<br>(39.1)                                | -5.2<br>(-22.0,11.6)                                                     | 0.54                |
| 24,25(OH) <sub>2</sub> D <sub>3</sub> :25(OH)D (pg/ng)             | 53.8<br>(41.0)                            | 87.0<br>(118.3)                               | -33.2<br>(-79.8,13.3)                                                    | 0.16                |
| 1,25(OH) <sub>2</sub> D <sub>3</sub> :25(OH)D <sub>3</sub> (pg/ng) | -34.0<br>(29.8)                           | -22.3<br>(103.6)                              | -11.7<br>(-52.0, 28.6)                                                   | 0.57                |
| Vitamin D binding protein (µg/mL)                                  | -2.5<br>(12.1)                            | 2.4<br>(11.5)                                 | -4.9<br>(-10.7, 0.9)                                                     | 0.10                |
| Estimated bioavailable 25(OH)D ng/mL                               | 160.1<br>(120.4)                          | 138.2<br>(154.0)                              | 21.9<br>(-49.5, 93.3)                                                    | 0.55                |

Cell contents are mean percentage change (SD) with treatment and difference in mean percentage change (95% confidence interval), or p-value for interaction comparing change among participants with CKD to change among participants without CKD. Abbreviations: 25(OH)D, 25-hydroxyvitamin D; 25(OH)D<sub>3</sub>, 25-hydroxyvitamin D<sub>3</sub>; 25(OH)D<sub>2</sub>, 25-hydroxyvitamin D<sub>2</sub>; 25(OH)D total, 25-hydroxyvitamin D<sub>2</sub> and 25-hydroxyvitamin D<sub>3</sub>; 1,25(OH)<sub>2</sub>D<sub>2</sub>, 1,25-dihydroxyvitamin D<sub>2</sub>; 1,25(OH)<sub>2</sub>D<sub>3</sub>, 1,25-dihydroxyvitamin D<sub>3</sub>; 1,25(OH)<sub>2</sub>D<sub>3</sub>; total, 1,25-dihydroxyvitamin D<sub>2</sub> and



*Supplemental material is neither peer-reviewed nor thoroughly edited by CJASN. The authors alone are responsible for the accuracy and presentation of the material.*

1,25-dihydroxyvitamin D<sub>3</sub>; 24,25(OH)<sub>2</sub>D<sub>3</sub>, 24,25-dihydroxyvitamin D<sub>3</sub>; PTH, parathyroid hormone; FGF-23, fibroblast growth factor 23; 24,25(OH)<sub>2</sub>D<sub>3</sub>:25(OH)D, the ratio of 24,25-dihydroxyvitamin D<sub>3</sub> and 25-hydroxyvitamin D<sub>3</sub>; 1,25(OH)<sub>2</sub>D<sub>3</sub>:25(OH)D<sub>3</sub>, the ratio of 1,25-dihydroxyvitamin D<sub>3</sub> and 25-hydroxyvitamin D<sub>3</sub>.

**Supplementary Figure 1: Relationships of baseline plasma PTH and FGF-23 concentrations with change in mineral metabolism biomarkers with treatment, by CKD status.**

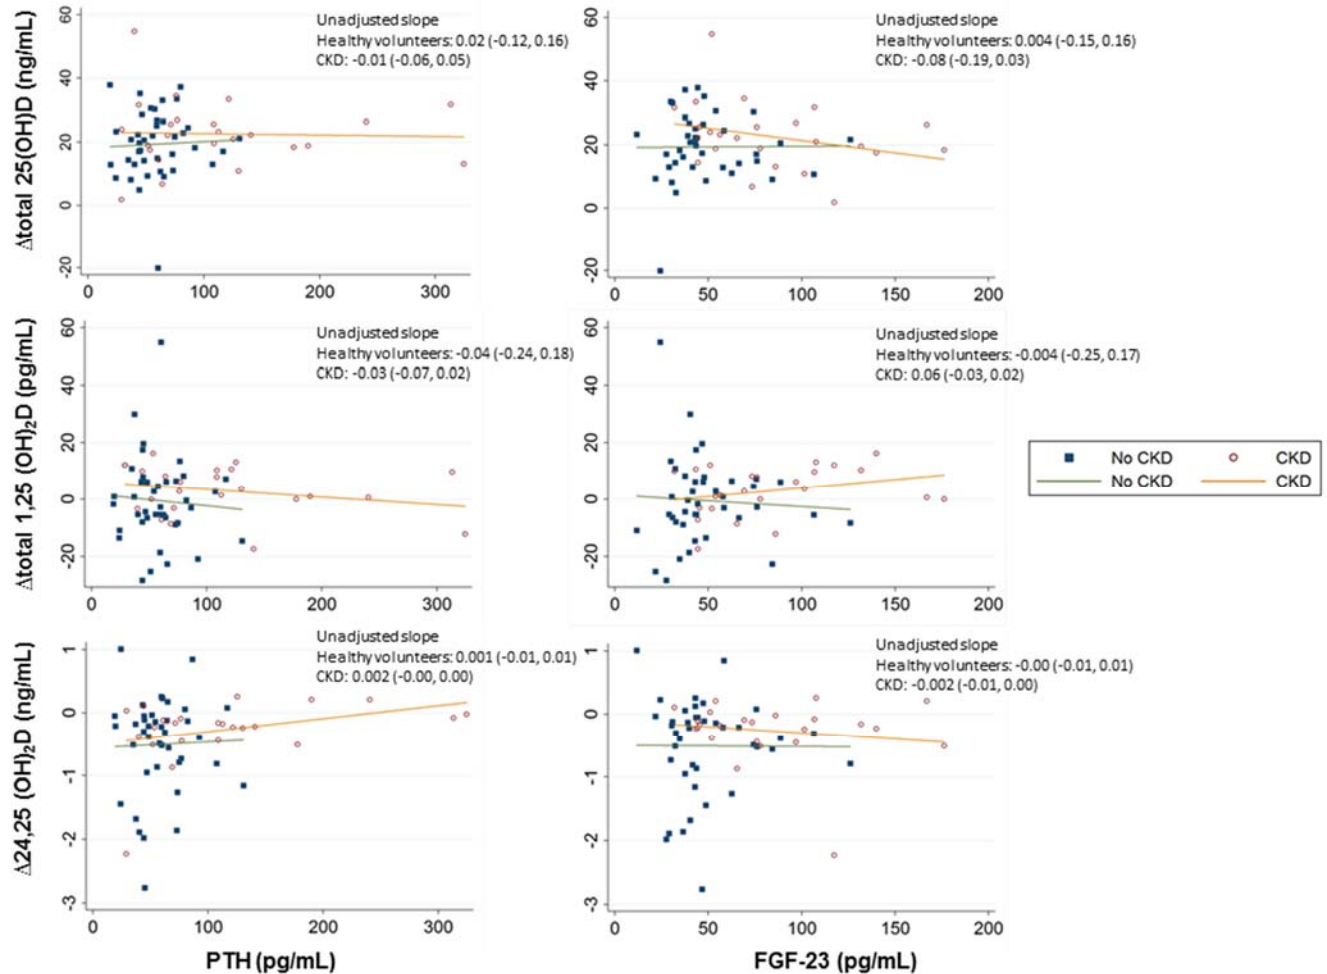

Relationships of change in total 25-hydroxyvitamin D; change in total 1,25 dihydroxyvitamin D and change in total 24,25-dihydroxyvitamin D<sub>3</sub> with baseline PTH and baseline FGF-23. Blue boxes represent individual values for participants without CKD and red circles individual values for participants with CKD. Solid lines represent mean concentrations using linear fit lines. Unadjusted slopes with 95% confidence intervals represented on each graph. Abbreviations: 25(OH)D, 25-hydroxyvitamin D; 1,25-dihydroxyvitamin D; 1,25(OH)<sub>2</sub>D; 24,25(OH)<sub>2</sub>D<sub>3</sub>, 24,25-dihydroxyvitamin D<sub>3</sub>; PTH, parathyroid hormone; FGF-23, fibroblast growth factor 23.

**Supplementary Figure 2: Relationships of baseline plasma PTH and FGF-23 concentrations with baseline mineral metabolism biomarkers, by CKD status.**

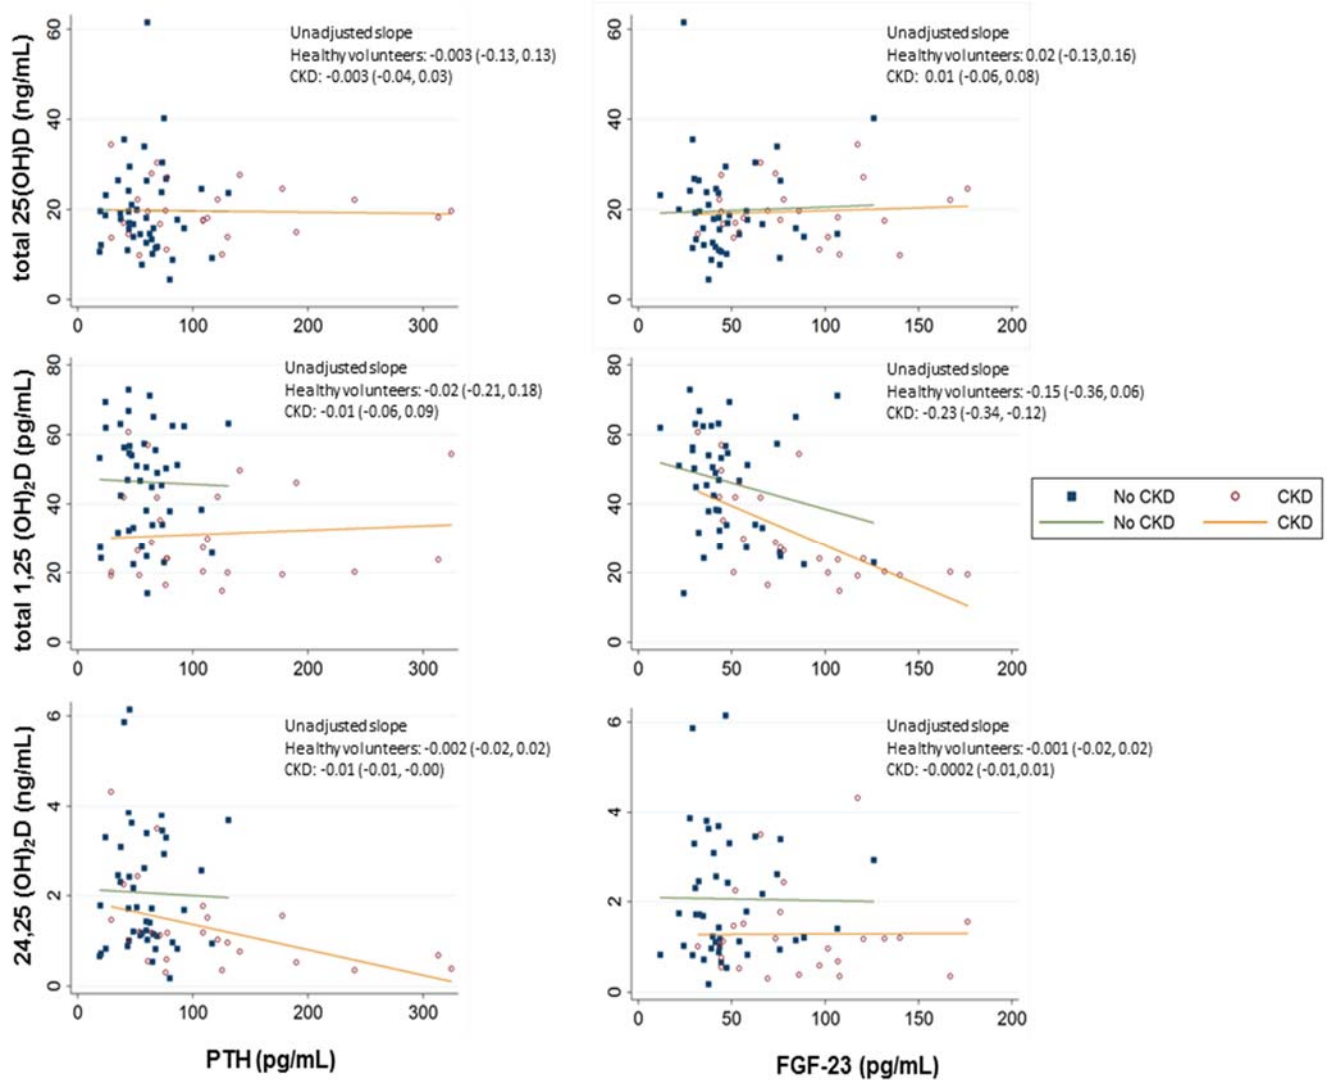

Relationships of baseline total 25-hydroxyvitamin D; total 1,25 dihydroxyvitamin D and total 24,25-dihydroxyvitamin D<sub>3</sub> with baseline PTH and baseline FGF-23. Blue boxes represent individual values for participants without CKD and red circles individual values for participants with CKD. Solid lines represent mean concentrations using linear fit lines. Unadjusted slopes with 95% confidence intervals represented on each graph. Abbreviations: 25(OH)D, 25-hydroxyvitamin D; 1,25-dihydroxyvitamin D; 1,25(OH)<sub>2</sub>D; 24,25(OH)<sub>2</sub>D<sub>3</sub>, 24,25-dihydroxyvitamin D<sub>3</sub>; PTH, parathyroid hormone; FGF-23, fibroblast growth factor 23.

**Supplementary Figure 3: Relationships of baseline plasma PTH and FGF-23 concentrations with change in vitamin D metabolic ratios with treatment, by CKD status.**

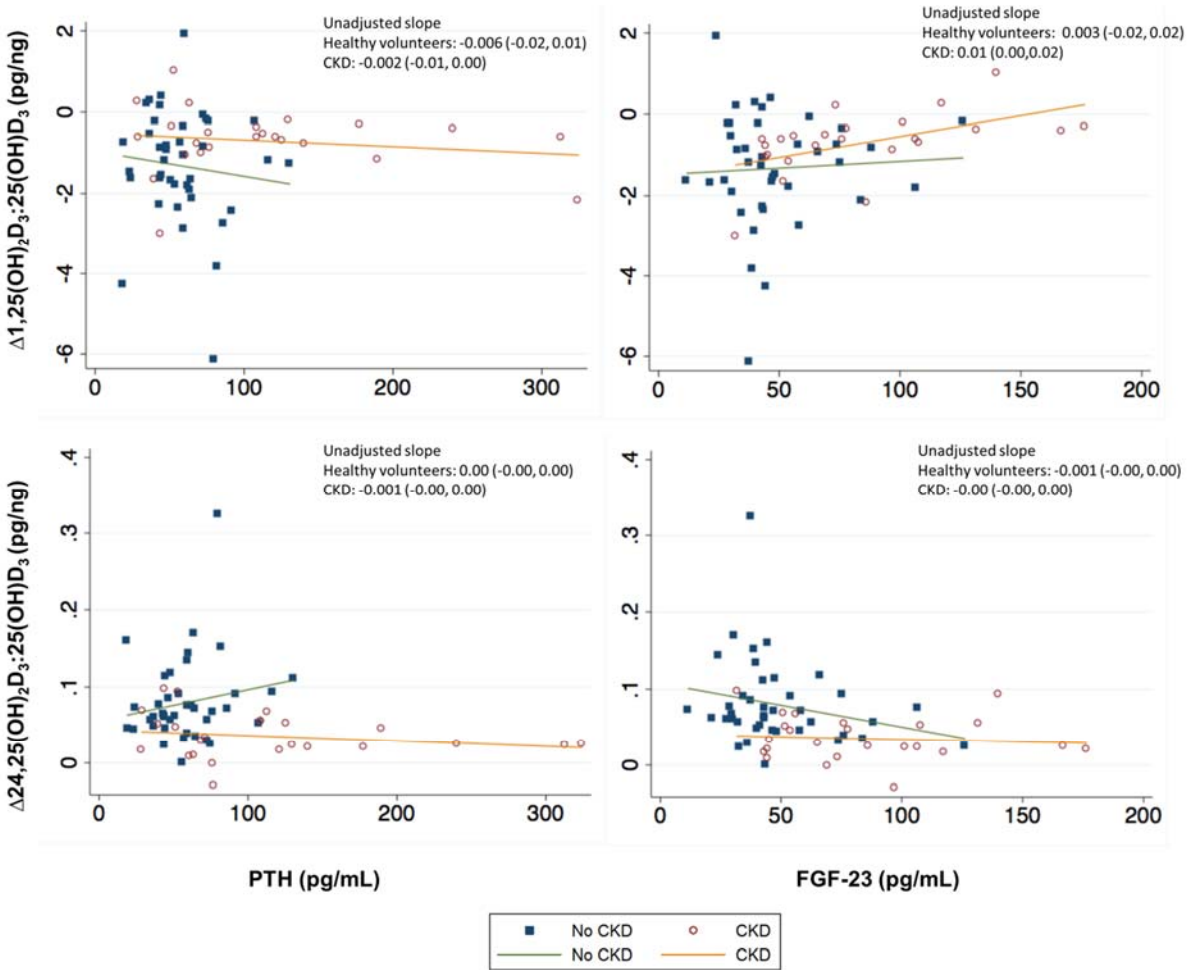

Relationships of changes in concentrations of 1,25(OH)<sub>2</sub>D<sub>3</sub>:25(OH)D<sub>3</sub> and 24,25(OH)<sub>2</sub>D<sub>3</sub>:25(OH)D<sub>3</sub> vitamin D metabolic ratios with baseline PTH and baseline FGF-23. Blue boxes represent individual values for participants without CKD and red circles individual values for participants with CKD. Solid lines represent mean concentrations using linear fit lines. Unadjusted slopes with 95% confidence intervals represented on each graph. Abbreviations: PTH, parathyroid hormone; FGF-23, fibroblast growth factor 23; 24,25(OH)<sub>2</sub>D<sub>3</sub>:25(OH)D<sub>3</sub>, the ratio of 24,25-dihydroxyvitamin D<sub>3</sub> and 25-hydroxyvitamin D<sub>3</sub>; 1,25(OH)<sub>2</sub>D<sub>3</sub>:25(OH)D<sub>3</sub>, the ratio of 1,25-dihydroxyvitamin D<sub>3</sub> and 25-hydroxyvitamin D<sub>3</sub>.

**Supplementary Figure 4: Relationships of baseline plasma PTH and FGF-23 concentrations with change in baseline vitamin D metabolic ratios, by CKD status.**

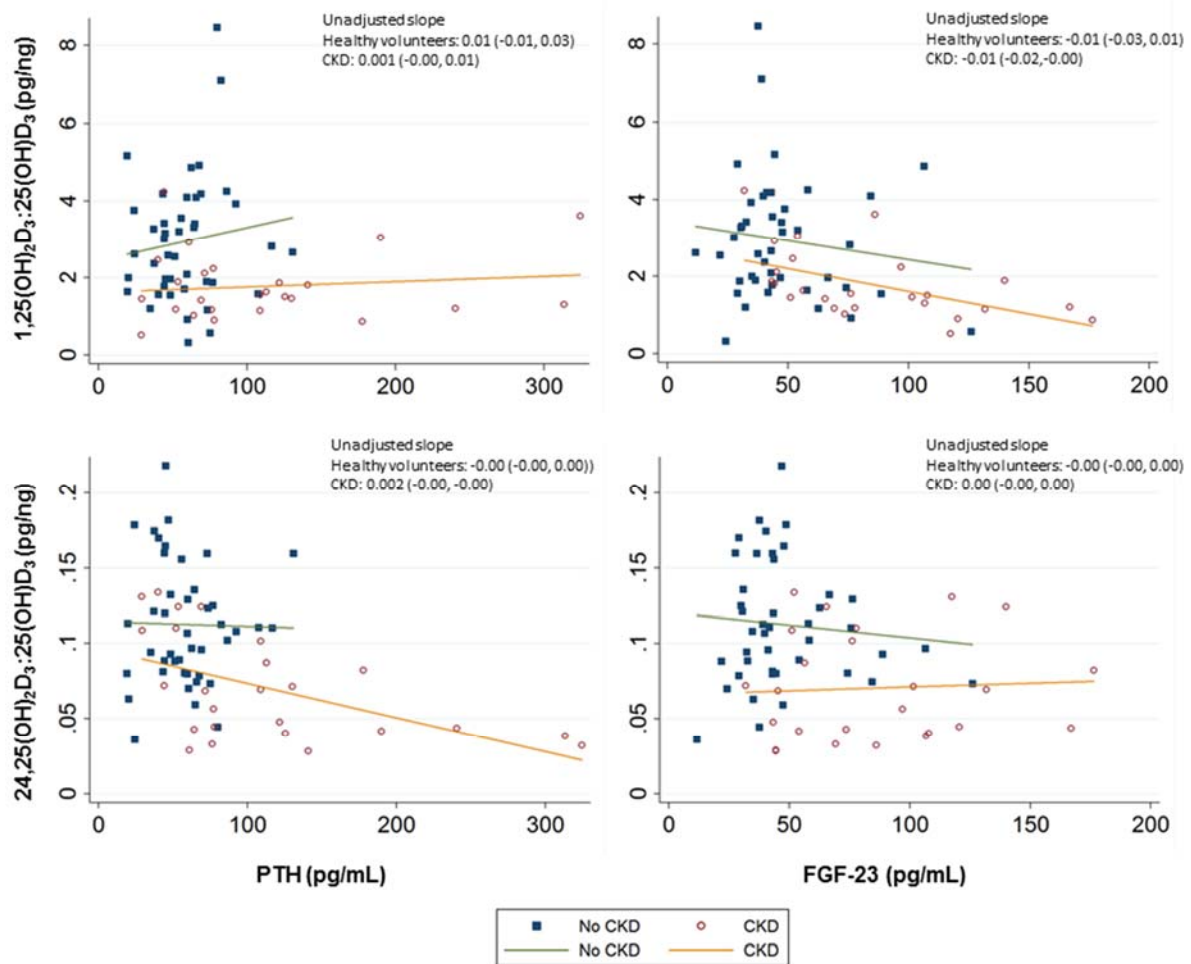

Relationships of baseline 1,25(OH)<sub>2</sub>D<sub>3</sub>:25(OH)D<sub>3</sub> and 24,25(OH)<sub>2</sub>D<sub>3</sub>:25(OH)D<sub>3</sub> vitamin D metabolic ratios with baseline PTH and baseline FGF-23. Blue boxes represent individual values for participants without CKD and red circles individual values for participants with CKD. Solid lines represent mean concentrations using linear fit lines. Unadjusted slopes with 95% confidence intervals represented on each graph. Abbreviations: PTH, parathyroid hormone; FGF-23, fibroblast growth factor 23; 24,25(OH)<sub>2</sub>D<sub>3</sub>:25(OH)D<sub>3</sub>, the ratio of 24,25-dihydroxyvitamin D<sub>3</sub> and 25-hydroxyvitamin D<sub>3</sub>; 1,25(OH)<sub>2</sub>D<sub>3</sub>:25(OH)D<sub>3</sub>, the ratio of 1,25-dihydroxyvitamin D<sub>3</sub> and 25-hydroxyvitamin D<sub>3</sub>

Supplemental material is neither peer-reviewed nor thoroughly edited by CJASN. The authors alone are responsible for the accuracy and presentation of the material.

**Supplementary Table S4: Vitamin D Binding Protein Haplotypes of Study Participants, by CKD status.**

| <b>Haplotype</b> | <b>CKD<br/>eGFR&lt;60<br/>mL/min/1.73m<sup>2</sup><br/>N=43</b> | <b>Non-CKD<br/>eGFR≥60<br/>mL/min/1.73m<sup>2</sup><br/>N=25</b> |
|------------------|-----------------------------------------------------------------|------------------------------------------------------------------|
| Gc2/Gc1f         | 2 (8)                                                           | 4 (9)                                                            |
| Gc1f/Gc1s        | 3 (12)                                                          | 8 (19)                                                           |
| Gc1s/Gc1s        | 6 (24)                                                          | 11 (26)                                                          |
| Gc2/Gc1s         | 8 (32)                                                          | 9 (21)                                                           |
| Gc1f/Gc1f        | 5 (20)                                                          | 6 (14)                                                           |
| Gc2/Gc2          | 1 (4)                                                           | 5 (12)                                                           |

Cell contents are presented as N (%), frequency of haplotype by CKD status. Data is missing for 1 participant in the CKD group.
